# Supplementary material for: Characterization of the Aroma Profiles of Guangdong Black Teas Using Non-Targeted Metabolomics
Source: MDPI journal article supplement (doi:10.3390/foods12071560), 2023-04-06
Supplement: s1 [file s1]

**Table S1.** Sensory evaluation of aroma in black tea samples.

| NO. | Sample source      |           | Aroma profile                                                     |
|-----|--------------------|-----------|-------------------------------------------------------------------|
| 1   | Yingde black tea   | YJ-Yingde | Relatively clean and lasting sweet and orchid aroma               |
| 2   |                    |           | Slightly clean and lasting sweet aroma, with minty odor           |
| 3   |                    |           | Markedly sweet aroma                                              |
| 4   |                    |           | Clean and lasting sweet with orchid aroma                         |
| 5   |                    |           | Clean and lasting sweet with orchid aroma                         |
| 6   |                    |           | Relatively clean and lasting sweet and orchid aroma               |
| 7   |                    |           | Relatively clean and lasting sweet and orchid aroma               |
| 8   |                    |           | Sweet with orchid aroma                                           |
| 9   |                    |           | Relatively clean and lasting sweet and orchid aroma               |
| 10  |                    |           | Relatively clean and lasting sweet and orchid aroma               |
| 11  |                    |           | Relatively clean and lasting sweet and orchid aroma               |
| 12  |                    |           | Relatively clean and lasting sweet and orchid aroma               |
| 13  |                    | HY-Yingde | Fine, sharp, and lasting sweet and floral aroma                   |
| 14  |                    |           | Relatively clean and lasting sweet and orchid aroma               |
| 15  |                    |           | Fine, sharp and lasting sweet and floral aroma                    |
| 16  | Luokeng black tea  |           | Strong and lasting almond and sweet aroma                         |
| 17  |                    |           | Relatively clean and lasting sweet and floral odors               |
| 18  |                    |           | High and lasting sweet and floral odor                            |
| 19  |                    |           | Aroma of almond and sweet aroma                                   |
| 20  | Renhua black tea   |           | Delicate, lasting medicinal and sweet aroma                       |
| 21  |                    |           | Delicate, lasting medicinal and sweet aroma                       |
| 22  |                    |           | Medicinal and sweet floral aroma                                  |
| 23  |                    |           | Medicinal and sweet floral aroma                                  |
| 24  |                    |           | Clean and lasting sweet and floral odor                           |
| 25  |                    |           | Delicate, lasting medicinal and sweet aroma                       |
| 26  | Meizhou black tea  |           | Relatively clean and lasting sweet and floral odors               |
| 27  |                    |           | Medicinal and sweet odors                                         |
| 28  |                    |           | Relatively clean and lasting sweet and floral aroma               |
| 29  | Heyuan black tea   |           | Relatively pure, strong and lasting honey, sweet and floral aroma |
| 30  | Lianshan black tea |           | Medicinal and sweet aroma                                         |
| 31  | Chaozhou black tea |           | Sweet, floral and medicinal aroma, with some sour odor            |
