# Supplementary material for: Characterization of the Aroma Profiles of Guangdong Black Teas Using Non-Targeted Metabolomics
Source: Foods. 2023 Apr 6;12(7):1560. doi: 10.3390/foods12071560 (PMC10094627; doi:10.3390/foods12071560)
Supplement: Supplementary file 1 [file foods-12-01560-s001.zip › foods-2240337 - Table S2 - for publish.xls]

## Sheet: Sheet1
Table S2: Volatile metabolites and relative concentrations detected in black teas by GC-MS.
Alignment ID	Average Rt(min)	Quant mass	Metabolite name	Yingde black tea															Luokeng black tea				Renhua black tea						Meizhou black tea			Heyuan black tea	Lianshan black tea	Chaozhou black tea
				YJ-Yingde												HY-Yingde
				1	2	3	4	5	6	7	8	9	10	11	12	13	14	15	16	17	18	19	20	21	22	23	24	25	26	27	28	29	30	31
1	6.31	71	2-Ethoxytetrahydrofuran	15.4545	5.54095	19.6121	10.7637	13.194	16.1322	12.7648	16.7162	24.4835	24.1604	39.7735	13.7968	6.93984	4.81049	38.299	1.32047	3.43834	6.54796	2.47369	2.24615	2.80869	1.26161	5.34891	2.68548	2.52655	4.60471	1.69866	8.49757	12.7672	0.967664	2.12313
2	6.71	44	Hexanal	7.63007	7.69516	11.0779	4.60447	8.25578	8.50095	9.84993	10.5544	10.1524	11.1365	6.45573	4.79596	10.867	5.11248	8.79018	5.6721	15.6893	7.77585	17.8725	6.35058	8.81978	14.0081	3.77129	3.22353	4.78067	12.6921	6.69979	2.95882	5.82546	6.6391	7.64834
3	8.23	91	Benzene, 1,3-dimethyl-	5.79411	14.6391	11.0175	12.0711	9.57582	10.0579	8.33065	11.1624	16.1553	8.1985	9.33199	8.18641	8.50064	12.8677	40.118	8.38684	15.7316	11.6764	16.0764	11.6831	13.9192	8.26078	10.4462	11.7692	8.14543	11.7042	10.1668	7.24332	6.60203	14.0271	10.2985
4	9.47	58	2-Heptanone	3.4091	6.84278	8.53157	7.05261	3.3229	3.59247	3.37481	4.05027	4.86364	5.06533	4.1667	1.16377	4.23952	1.28685	2.10429	1.7933	4.54613	4.33292	5.91409	3.36128	4.09355	4.28531	2.67791	1.19476	3.0824	2.50014	2.50924	1.14442	2.39578	3.23067	3.77477
5	9.86	68	D-Limonene	44.4341	20.2652	30.8748	49.6463	60.4692	60.9145	48.2132	47.5769	32.8531	73.6575	36.2527	61.1282	29.6548	32.6527	7.06133	20.4959	6.48784	31.4571	21.3078	36.92	43.8836	21.5497	38.0216	40.1964	38.5095	14.2321	28.5986	45.12	16.4254	47.541	30.747
6	10.11	93	.beta.-Phellandrene	14.5127	7.29236	9.17598	22.0805	26.4463	27.201	21.9447	21.1027	14.6376	33.8651	16.0028	32.2176	17.7535	18.6597	1.86911	12.3698	3.18321	11.6738	10.8021	96.6462	89.3711	19.4514	52.052	130.468	82.2252	8.94475	13.8815	28.1087	9.90955	9.71581	15.2992
7	10.88	81	Furan, 2-pentyl-	12.1961	15.879	29.3736	14.0602	17.0749	16.102	16.3344	16.5337	19.6312	30.5086	17.72	7.3498	23.1878	9.46545	19.7728	5.99629	25.8316	16.7361	24.4727	26.1945	22.0199	34.4594	13.6547	10.9285	17.5708	19.9436	12.5117	4.10458	6.96469	8.81427	12.2034
8	10.98	88	Hexanoic acid, ethyl ester	11.115	14.3599	12.7548	4.90933	6.72122	5.90259	5.01715	7.35377	11.466	8.5435	5.09486	5.67903	5.73921	7.45063	3.25702	9.95694	9.91634	4.23331	7.79315	9.41062	7.34423	13.7074	6.76064	6.17367	11.4219	7.25366	5.96005	4.14399	5.17337	2.92849	5.33973
9	11	93	trans-.beta.-Ocimene	24.6251	17.6239	15.2014	34.4714	47.9047	49.0447	38.9765	35.7089	23.2424	50.5126	25.444	50.644	44.5302	48.6694	2.37802	35.2927	6.33566	46.8348	27.9618	43.426	59.0393	23.8547	41.8084	38.2754	56.2051	31.4003	46.4661	106.859	30.3614	27.4595	54.3364
10	11.46	93	1,3,6-Octatriene, 3,7-dimethyl-, (Z)-	31.7437	23.2277	19.6649	45.531	64.6704	66.4327	53.1167	47.8456	30.8763	67.4594	34.2638	67.8631	58.6511	65.7357	3.05392	46.5662	8.57997	56.1102	35.4769	54.3022	75.2465	32.1859	54.3614	50.817	72.4905	41.2852	60.3697	140.209	39.7819	33.3504	72.2298
11	11.8	94	Pyrazine, methyl-	14.9729	5.96565	8.89562	2.91109	11.3405	12.4681	11.4191	12.1636	17.618	3.21771	11.1287	5.71635	7.92472	6.58734	8.85133	4.91451	14.9986	54.1907	9.95059	10.0953	6.45423	10.5472	8.13136	2.4523	5.15035	10.5244	23.9473	22.5789	15.0189	12.15	40.1886
12	11.9	119	Benzene, 2-ethyl-1,4-dimethyl-	24.4756	11.9035	18.3666	25.5209	22.9863	22.1754	17.7592	21.9835	17.6895	41.8087	18.9874	28.4606	16.0749	13.3813	7.73313	12.4833	4.83202	26.6123	25.7752	565.252	464.973	71.7675	258.698	568.186	417.896	6.488	13.4466	19.0616	11.2066	47.5086	15.3641
13	12.68	43	2-Propanone, 1-hydroxy-	8.7531	47.1291	77.4095	74.4839	48.945	49.7053	54.1326	54.0409	79.377	49.735	71.8701	43.6623	54.3775	44.6642	69.647	34.9498	54.3408	46.1377	55.9062	49.635	43.8266	53.2337	44.4142	49.4876	43.2571	40.7842	41.713	26.6449	42.7113	64.1542	37.3823
14	12.8	71	Tridecane	99.0378	133.203	198.918	194.487	156.557	150.895	141.406	161.638	198.58	155.565	178.155	133.415	143.479	131.571	220.953	101.958	141.087	113.89	146.965	122.215	117.851	128.629	131.285	147.174	127.533	124.353	101.326	79.1412	105.613	158.603	101.908
15	12.86	69	3-Hexenoic acid, ethyl ester	29.7244	8.95454	13.5508	11.497	18.7316	20.0341	18.4854	18.488	18.8363	6.56366	9.58655	13.29	4.69612	14.6224	8.13481	11.4231	7.97447	5.43684	16.2979	11.5515	9.73222	10.2765	5.83196	7.97623	15.9766	4.12386	7.37728	3.44772	3.99602	18.512	6.61218
16	13.38	108	Pyrimidine, 4,6-dimethyl-	3.28981	0.822529	3.29799	0.707274	3.94513	4.17029	3.28359	4.10771	5.81572	0.861517	3.81389	1.42519	4.15671	2.32147	0.965267	1.86924	3.07706	17.7314	1.70169	6.48457	2.99096	2.83881	4.53233	1.37698	3.66371	6.66112	12.4913	9.32286	3.71841	3.66427	8.71884
17	13.43	57	2-Penten-1-ol, (Z)-	59.0717	49.62	41.35	59.5159	46.9234	64.4404	60.7824	52.3869	48.7218	49.2244	44.4844	45.3667	56.7333	47.9836	14.6715	7.95571	31.0357	23.8349	38.79	9.92415	22.5248	36.7337	25.7231	13.6766	11.3636	12.3028	39.189	6.7052	18.8304	17.9637	16.8313
18	13.75	88	Heptanoic acid, ethyl ester	1.28661	2.28548	2.19115	0.61032	1.34942	1.10984	0.778068	0.993864	1.58808	0.958098	0.670337	0.47822	0.827942	1.3334	1.04921	25.6358	1.87582	1.33035	16.2164	8.13238	2.89776	10.6799	4.63118	5.69313	5.16453	1.66273	0.595354	0.90833	1.06772	0.716974	1.98499
19	14.36	57	1-Hexanol	16.3946	56.8122	83.972	79.531	65.4908	62.6902	61.8487	67.9351	86.8739	69.865	77.2426	56.7511	60.8845	55.9974	87.9887	44.5835	65.5694	45.8811	54.6079	51.3437	54.9587	58.6314	54.4284	62.0498	55.6006	49.8272	41.3265	30.7415	40.8195	69.6792	39.4067
20	14.76	121	2,4,6-Octatriene, 2,6-dimethyl-, (E,Z)-	5.98408	3.95897	3.46431	6.82036	8.84235	8.70494	6.7394	6.19626	4.19312	8.57804	4.42651	8.10832	7.50511	7.94794	0.731839	5.60328	1.44405	12.452	6.77011	9.13561	11.7903	4.57428	7.97622	6.92885	10.0402	5.75318	8.18071	18.0349	5.19681	4.8394	9.01439
21	15.11	121	Pyrazine, 2-ethyl-6-methyl-	1.5108	0.530835	1.33638	0.275991	1.773	2.00688	1.55925	2.06645	2.98654	0.386045	1.8773	0.729779	1.28361	0.776134	0.980992	0.746059	2.14437	10.2011	1.10922	2.75472	1.33366	1.43665	1.811	0.666285	1.53559	1.99209	5.17878	5.33365	3.38997	1.86675	5.59994
22	15.15	67	3-Hexen-1-ol, (Z)-	110.864	123.105	46.1171	94.484	108.386	121.555	110.916	94.2176	52.3566	89.4243	48.8889	79.0597	95.2487	135.181	7.46185	9.45632	19.9167	34.5074	27.732	16.9909	27.8348	24.5895	18.2417	23.0737	12.9145	16.2933	63.9519	16.9856	16.3589	11.9552	22.1582
23	15.51	57	Tetradecane	81.4988	49.3928	79.5223	88.3407	80.8183	78.7241	90.2987	91.8442	113.231	80.2882	88.6332	89.4428	71.3252	70.3103	82.6492	47.4089	70.4219	39.2653	46.2842	51.5701	58.4878	44.1224	57.8821	61.5362	56.4962	53.6876	41.0717	32.6709	44.4303	36.0119	61.7003
24	15.61	122	3-Pyridinamine, 2,6-dimethyl-	1.68508	0.515007	1.82606	0.36972	2.50857	2.64669	1.96601	2.02334	2.81405	0.387161	1.71007	0.699255	1.61712	1.06107	2.63905	0.809195	4.03787	8.71259	1.04899	3.61331	1.44604	1.80615	2.25077	0.635226	1.95242	3.14993	5.96559	5.16703	2.36235	2.93196	5.97817
25	16.41	132	Butanoic acid, 1,1-dimethyl-2-phenylethyl ester	8.06415	8.36096	7.32005	8.94879	9.14328	8.50051	7.03482	8.12179	7.20314	16.0835	9.96319	9.73835	7.41198	8.85999	12.9126	6.01964	4.6088	12.1833	12.3225	87.9454	87.7299	46.6866	40.8721	89.9973	73.607	3.13479	8.32594	8.46866	10.465	21.4663	9.29127
26	16.45	88	.alpha.-Ethyl aspartate	2.28336	4.67798	5.56897	1.8743	4.18606	3.18602	1.90782	2.30785	3.80348	2.85427	2.46945	1.61258	2.05583	2.30185	4.00849	9.15344	5.00429	2.70825	5.76566	7.87565	3.92949	4.92607	4.79738	5.75007	6.91341	2.80821	1.54939	1.82176	2.14862	1.4287	1.73225
27	16.55	57	2,6,10-Trimethyltridecane	31.2207	81.1771	126.831	116.802	95.2433	92.386	102.679	111.098	130.367	123.807	132.866	99.873	107.658	93.1218	154.102	76.4768	113.406	68.179	80.2659	83.8726	83.9483	93.0123	90.7667	107.139	99.3677	86.443	72.3099	55.8043	76.2479	122.584	71.0742
28	16.65	59	2-Furanmethanol, 5-ethenyltetrahydro-.alpha.,.alpha.,5-trimethyl-, cis-	208.042	341.82	95.2092	110.493	121.122	128.29	95.0885	129.817	86.0922	203.436	124.25	189.103	118.685	213.759	19.3393	117.77	40.098	141.443	94.0269	71.2831	95.9381	98.9457	150.57	53.5513	68.7335	219.697	219.548	122.887	288.765	300.22	109.162
29	17.05	207	Ethanone, 1-(3,4-dimethylphenyl)-	25.157	17.1282	27.5637	28.4606	20.1699	19.7869	21.9004	18.6534	22.5806	23.9545	22.3175	14.6082	16.0602	11.2479	17.0549	8.94299	12.4031	14.2491	21.9257	15.9095	17.4032	18.0742	24.2031	17.1431	15.9082	11.7862	10.2604	8.30292	9.77968	10.859	9.83687
30	17.09	67	1-Pentylcyclopentanol	14.731	18.137	10.0665	11.0186	20.0588	19.8795	20.3419	18.4061	13.3952	13.117	12.4333	11.8223	17.7206	24.5747	9.47678	5.70324	12.0411	16.0653	15.1231	12.611	15.137	10.7093	8.74861	13.968	10.0585	5.75187	16.6001	5.98093	10.1404	5.80109	6.91447
31	17.37	59	trans-Linalool oxide (furanoid)	525.811	419.306	240.679	293.571	337.865	355.984	257.005	333.892	215.536	484.183	324.92	503.001	307.179	343.363	24.8312	258.452	70.8875	338.246	220.596	115.64	156.868	157.276	286.938	157.236	116.629	514.13	364.449	355.823	574.471	467.959	219.03
32	17.83	81	2,4-Heptadienal, (E,E)-	17.3607	24.9916	45.6319	17.7873	13.8803	17.5811	25.1949	46.2763	50.7646	55.0592	23.2635	21.7802	53.8152	17.3665	46.9895	13.8962	77.2994	21.6965	49.0408	15.5559	29.5729	21.3683	8.1893	6.46719	11.3712	32.5939	17.9633	6.16204	30.3441	32.398	26.8527
33	17.96	71	Octadecane	41.2159	65.1746	95.5757	85.6758	73.5464	69.4158	76.6797	84.6006	102.196	98.69	96.9962	75.2648	78.661	69.5774	111.952	52.4441	80.1734	50.3369	65.2868	62.231	54.9236	73.9096	71.9354	88.8671	77.8379	65.5119	62.1085	43.1388	65.1298	84.124	52.6848
34	18.04	46	Methoxyacetic acid, 3-tetradecyl ester	0.0445005	0.054008	0.0233547	0.0261707	0.0186636	0.0191515	0.0236804	0.0145921	0.0102539	0.012248	0.0173406	0.0100287	0.00861407	0.00617206	0.00652225	0.00186701	0.00419123	0.0114504	0.00669362	0.00716089	0.00738538	0.00583159	0.00808151	0.00900047	0.00440175	0.0110942	0.000912175	0.00587753	5.74156e-05	5.74156e-05	0.00180681
35	18.07	133	Pentadecane	3.52904	23.1105	25.6297	28.832	17.5094	16.9298	17.8665	18.0077	22.7026	16.3565	21.924	17.0509	18.6146	15.5375	38.4395	14.8773	19.9949	15.8576	19.5149	14.0222	12.1593	18.9629	14.7501	18.294	15.6735	15.4111	11.6502	8.79371	13.3711	20.0366	12.4725
36	18.11	95	Ethanone, 1-(2-furanyl)-	27.2303	12.3012	16.1862	10.8229	25.8379	28.8101	22.9966	21.9204	16.91	11.0373	18.513	11.9894	15.3283	12.6382	10.9783	5.74211	15.4633	28.5324	12.4318	21.3478	22.9834	16.6656	16.0146	10.3108	16.2843	13.2891	60.9665	10.1602	11.3631	32.6126	29.7381
37	18.53	106	Benzaldehyde	565.482	330.523	628.066	372.468	279.251	300.569	336.188	471.833	606.131	392.513	458.245	417.167	297.859	190.736	733.426	2619.61	443.512	470.809	1824.31	182.901	176.633	231.606	194.919	177.956	162.686	283.687	111.434	160.443	214.16	218.872	253.709
38	18.66	93	2-Nonanol	4.76947	15.3456	2.8204	1.9501	1.87811	2.01281	1.39569	2.84302	1.92096	7.94784	3.92315	3.67012	1.49604	3.07914	6.39541	3.78038	1.91006	3.58629	1.33203	1.43292	1.72537	3.50313	5.49883	1.38893	1.54754	10.08	0.971652	2.62127	8.37714	6.0072	1.76864
39	18.97	28	3-(3-Cyano-4-hydroxyphenyl)-l-alanine	0.791112	0.706981	0.950151	0.921864	0.503276	1.20999	1.50211	1.47526	1.02902	1.12741	2.37973	0.687731	0.601988	0.62516	1.66578	1.59133	1.0276	0.282211	0.500493	0.459021	0.409423	0.404739	0.402426	0.726224	0.0837096	4.17305	1.93429	2.09135	1.80941	14.0131	6.64155
40	19.32	71	Linalool	1542.07	588.113	852.534	1582.7	2002.24	2066.04	1731.92	1501.08	1029.43	1539.92	919.629	1485.44	551.587	731.826	60.1079	128.084	136.32	241.812	302.213	92.2758	135.155	192.312	251.787	233.312	113.862	91.8256	298.902	185.404	193.529	241.76	130.32
41	19.69	119	2-epi-.alpha.-Funebrene	9.94916	5.13272	10.3891	8.00789	9.16258	7.16526	11.0911	8.65982	21.4653	5.39234	10.1062	14.1541	4.18371	4.16578	5.47874	8.48023	11.0217	6.03153	5.70138	6.23819	7.43994	12.6828	7.59763	8.10014	8.54391	7.71133	2.72667	11.0474	5.55424	22.1557	6.11813
42	19.74	43	Pentadecane, 3-methyl-	13.4983	16.908	21.1972	14.8785	15.903	15.4727	17.7808	19.468	24.3015	20.3274	19.5552	15.2385	20.1722	12.9755	17.504	9.96793	19.3448	7.16476	13.8499	5.08962	14.4911	19.7585	12.5795	5.2959	13.2525	17.7751	9.22552	0.613452	11.2548	24.7533	15.6597
43	19.75	95	3,5-Octadien-2-one	14.5952	27.7162	27.5926	11.7199	11.5401	11.4634	14.1207	19.0786	26.8047	19.1134	13.6904	6.30806	33.5495	14.1558	12.4074	9.48025	29.245	15.3296	28.4214	11.601	24.2289	38.5121	10.9123	7.35882	14.512	33.9026	12.0301	8.47283	15.2172	18.568	30.1103
44	20.28	109	2-Acetyl-5-methylfuran	9.65609	20.1284	16.6597	6.14821	5.01579	6.29267	8.65807	13.0657	15.8336	10.8474	6.98839	6.20886	15.8759	11.8839	11.2198	8.39751	16.2687	11.2589	9.52907	7.96929	9.75676	11.7449	8.40843	5.33905	8.06804	14.4653	18.0944	9.10841	13.715	35.0221	23.5097
45	20.51	71	Hexadecane	37.5739	36.9679	40.1472	23.9873	21.2918	26.1773	40.5528	54.0809	63.5543	31.2	31.0619	31.0368	62.7282	35.3059	39.9852	28.4539	90.2213	30.3207	39.0456	16.5559	25.6569	26.6336	21.2481	21.5042	20.161	38.6042	44.0986	27.6119	28.3143	60.2245	73.6287
46	20.65	123	Phenol, 4-amino-2-methyl-	62.0874	48.0266	52.943	39.1271	131.071	138.616	103.34	81.7631	64.1145	34.9414	75.963	28.6909	55.8509	84.9914	61.848	18.1408	59.8942	72.2543	57.9709	229.131	139.509	106.015	340.812	134.708	131.91	28.6211	124.798	75.9845	32.2037	40.5807	62.2466
47	20.78	71	1,5,7-Octatrien-3-ol, 3,7-dimethyl-	101.026	350.595	37.9323	50.2306	58.4393	55.654	44.4515	52.8058	32.6624	75.0364	48.6281	119.719	68.7387	254.884	25.8231	113.755	41.5949	109.428	104.163	85.7541	99.4548	116.447	154.569	86.1841	86.6464	150.856	376.403	75.8714	298.817	219.471	142.336
48	20.95	137	1-Cyclohexene-1-carboxaldehyde, 2,6,6-trimethyl-	11.5561	12.2905	11.8029	9.27569	5.88817	9.034	14.5184	19.5615	23.3453	10.1277	11.2714	11.2196	21.6129	12.0428	16.4842	4.78309	30.9391	10.4663	14.5055	3.12707	7.21385	12.4745	5.78161	5.28274	4.202	8.13809	20.2598	4.87598	9.4319	7.25427	16.192
49	21.11	31	1,2-Ethanediol	9.32435	4.95573	9.45934	10.847	9.90074	9.87466	9.87634	9.74698	10.7206	11.4483	11.8019	7.96769	8.13886	8.15896	9.10203	8.6066	15.8221	6.9307	9.37243	2.72867	3.28815	7.6341	5.81855	10.4245	3.84759	9.79456	8.74223	7.06131	5.38667	13.4314	6.57768
50	21.36	91	Benzeneacetaldehyde	357.97	101.98	377.023	288.087	202.562	194.98	217.155	264.866	362.505	250.409	349.793	344.236	129.023	74.8106	341.433	91.5889	225.432	219.48	186.332	96.1071	73.4241	94.2387	72.0527	101.104	70.3007	100.49	19.5356	50.7291	102.269	39.8757	46.0253
51	21.68	73	N-Ethylformamide	4.06225	4.43117	6.37717	6.21547	18.8467	17.2773	10.0784	7.55538	7.25656	5.86103	7.62307	5.51271	9.1992	8.78669	5.0196	4.0723	4.83463	4.86693	3.87009	24.3748	21.2697	8.27077	44.8252	15.9197	19.0627	5.39981	8.02125	6.43972	3.15539	10.8025	6.88368
52	21.85	82	Hexanoic acid, 3-hexenyl ester, (Z)-	9.77256	45.4356	5.90866	10.4399	10.1893	12.6563	20.3802	15.7865	6.01654	13.7797	5.09601	12.0968	20.3499	82.4842	0.707186	0.52413	2.44551	9.3789	1.48863	11.8621	22.7793	9.25195	15.892	9.02852	19.4348	4.08039	59.3861	13.6908	9.08006	8.33068	7.10059
53	21.93	98	2-Furanmethanol	15.5738	3.99209	12.7249	12.0798	58.9888	39.8054	16.4587	9.37278	7.66472	17.5659	14.4069	12.7262	10.1477	8.07941	4.33039	6.94994	5.25377	9.84506	8.76476	38.9149	42.6102	11.4305	24.138	49.697	32.1483	6.2438	18.5724	5.1331	6.81547	15.3176	8.85278
54	22.11	60	Butanoic acid, 3-methyl-	0.12771	0.138956	0.145305	0.127987	0.122992	0.0947598	0.236336	0.207725	0.127258	0.141152	0.150258	0.250098	0.237057	0.219104	0.206465	0.107892	0.124029	51.6165	0.0754975	0.078149	0.0434889	0.0564761	0.0611966	0.0542567	0.0419609	69.6508	46.8375	76.2878	51.0568	97.7857	73.5905
55	22.14	74	5-Butyl-5-ethylpentadecane	3.37736	2.51722	3.06321	2.60215	2.02317	1.88305	1.57439	1.14045	2.2773	2.17133	1.88917	1.10064	1.40175	1.10342	2.06273	0.559721	0.64886	1.15312	1.37478	1.43205	1.46772	1.45481	1.84048	1.59615	1.38335	0.847238	0.738042	8.1562	0.779896	9.02595	5.47159
56	22.74	85	2,6-Octadienal, 2,6-dimethyl-8-(tetrahydro-2H-2-pyranyloxy)	26.3166	53.5083	20.3319	17.9977	21.7246	22.7435	26.3181	25.5785	19.0984	18.508	13.6181	21.9477	23.4861	42.5008	10.7744	11.4988	22.1495	16.6936	15.4448	12.2565	14.9345	17.965	18.775	11.4765	17.0674	15.0988	53.8888	19.2808	12.259	58.546	27.8879
57	22.8	59	.alpha.-Terpineol	50.1152	20.5534	39.483	44.2486	61.6211	61.8711	48.9024	50.1651	40.2257	70.8618	48.4121	45.0534	18.4056	16.6785	10.6581	11.9699	8.58102	18.0017	23.6215	46.8169	67.7459	37.7999	43.0192	159.546	50.5954	5.09043	22.9045	16.6573	8.45325	124.457	26.8126
58	23.04	82	Fumaric acid, cis-hex-3-enyl nonadecyl ester	1.82915	1.76369	2.35673	1.31612	1.51981	1.49256	2.11608	2.04122	2.59838	1.73331	1.98886	1.7523	1.4123	1.41676	3.37532	2.90466	3.65081	2.15484	1.17436	2.2632	1.6383	1.82014	1.66694	1.85081	2.47313	2.77104	1.10818	2.04242	1.90295	2.8193	1.37427
59	23.33	54	2-Cyclopenten-1-one	2.26082	2.05612	3.73122	2.63856	1.81606	1.87722	2.5621	3.61102	3.91071	3.89995	2.83258	1.93729	3.11767	1.90745	3.0306	1.52814	3.1351	1.80376	3.26964	2.11047	2.75539	1.68901	1.24506	1.56578	2.03051	1.88136	2.03351	0.616804	2.94894	2.13884	1.72877
60	23.39	133	Benzaldehyde, 2,5-dimethyl-	12.0509	13.3739	11.4394	6.83468	5.38517	8.2709	15.7699	20.6074	23.0798	7.28783	11.4239	10.6432	19.9641	14.5746	25.9881	4.06691	36.555	10.4177	13.2255	2.74728	7.39133	11.2459	5.57402	4.0748	4.45705	8.60017	24.3097	6.27808	14.1187	10.3288	22.8292
61	23.43	108	Acetic acid, phenylmethyl ester	2.6781	3.64145	2.44535	2.00063	2.32568	1.88935	1.7623	2.43181	2.41197	1.62642	1.96439	1.92503	4.83056	3.79942	2.65753	3.89781	3.23739	8.81687	2.44419	4.85107	3.992	2.9031	2.593	2.15364	3.75354	9.53313	2.72617	6.25571	6.75947	3.86861	6.32286
62	23.5	69	Citral	3.5633	15.0754	3.29792	2.82211	5.40228	3.36528	2.67526	2.77781	2.61093	3.95237	2.43626	3.31917	19.8105	20.1613	7.00517	23.4443	4.10756	55.7006	29.2081	57.8183	55.5107	27.9643	38.3157	38.5391	39.563	22.6282	34.1448	74.9065	21.1533	18.5049	41.5831
63	23.6	128	Azulene	43.7896	200.132	206.358	235.318	125.627	135.171	205.001	177.768	215.988	138.177	260.761	162.673	222.852	178.146	416.208	219.204	323.155	136.562	214.575	165.818	143.299	216.61	175.689	228.193	193.729	249.641	165.961	139.701	186.598	373.128	237.662
64	23.64	60	Pentanoic acid	0.36395	0.131635	0.402786	0.112613	0.227708	0.0557483	0.121799	0.0943314	0.209817	0.289847	0.108351	0.0987689	0.0746676	0.0584174	0.174658	0.0930289	0.15171	0.00400583	0.0662396	0.0453791	0.0345516	0.0598681	0.834555	0.0609542	0.292889	0.0989763	0.34658	2.03326	0.0161147	0.0628807	0.03138
65	23.73	68	(3R,6S)-2,2,6-Trimethyl-6-vinyltetrahydro-2H-pyran-3-ol	81.6487	188.398	33.9335	35.6467	42.011	41.102	30.9415	40.5165	26.6295	51.8149	47.5067	73.1095	48.2418	111.813	17.6986	82.8739	23.7854	101.185	49.5775	78.3175	95.1838	66.9492	95.4133	47.5896	73.7033	259.423	92.4081	132.437	248.762	90.7936	84.3347
66	23.77	157	Naphthalene, 1,2-dihydro-1,1,6-trimethyl-	7.64368	3.83492	6.20893	4.02902	3.68462	5.54607	7.99669	10.1353	12.3952	6.29533	9.56628	6.06766	8.75544	5.19232	7.01077	1.92382	9.41866	10.123	6.10346	2.41192	5.76364	6.1887	5.67968	2.90135	3.4707	5.13701	16.7958	5.25709	7.74822	14.1948	9.57206
67	23.88	55	2(5H)-Furanone	18.4444	11.3675	20.5732	10.9078	66.9111	46.2277	25.8936	15.6711	14.434	16.6224	13.5631	13.4085	14.1004	12.4472	11.1309	12.89	14.3664	15.5269	13.9874	50.1951	40.3121	20.1096	33.0887	55.9344	44.0034	17.4932	32.3601	11.3544	12.2178	103.614	28.5726
68	24	83	(E)-4-Oxohex-2-enal	12.5505	15.9805	19.6159	10.3648	8.72229	9.77	11.8184	13.6207	15.3303	11.8731	8.81287	7.68308	17.9074	13.2406	5.07729	6.52665	19.2287	9.61813	11.8654	6.01821	8.3169	15.9021	5.28993	6.60534	8.42211	10.2616	15.8706	5.92969	8.49558	18.684	15.2943
69	24.42	120	Methyl salicylate	890.114	782.364	296.579	695.15	506.422	549.217	606.135	641.409	301.225	364.924	121.378	994.498	697.594	996.06	40.8246	398.491	134.634	469.239	467.151	806.953	1121.95	1107.79	666.256	897.192	803.863	192.823	698.242	433.336	265.852	232.7	220.132
70	24.65	45	Benzene, 1-(2-butenyl)-2,3-dimethyl-	5.23167	3.76008	6.63177	4.24495	7.66603	7.63365	7.08617	6.90083	8.55649	5.10084	7.61919	5.43762	6.40234	6.27798	9.26835	6.39371	9.4952	6.58552	4.56761	5.2074	5.6989	7.08185	6.96501	5.57209	6.83119	7.01841	10.1012	7.27129	5.4998	9.48126	12.1971
71	24.66	83	(4-Methoxymethoxy-hex-5-ynylidene)-cyclohexane	2.23004	12.887	0.702625	0.526745	0.852595	0.780126	0.776016	1.09586	0.664425	0.788916	0.494818	1.54233	2.08022	5.96989	0.337325	7.43446	1.69762	3.61955	3.72157	1.66887	1.85282	4.63244	3.89705	0.699445	1.64622	5.86926	84.0111	6.70596	4.72254	48.6855	11.3375
72	24.79	69	6-Octen-1-ol, 7-methyl-3-methylene-	4.59713	7.22498	4.66727	6.40081	3.9478	3.93913	4.09035	4.54652	5.22045	5.9357	6.06613	4.35833	6.24097	6.57822	3.16385	4.27153	5.35411	10.0598	6.20733	5.64246	7.95911	6.23303	6.72324	4.79221	6.56396	5.70715	3.46016	9.66828	7.82181	2.06102	4.64964
73	25.09	69	2,6-Octadien-1-ol, 3,7-dimethyl-, (Z)-	17.2069	11.1265	14.3438	20.4728	20.6301	20.7407	18.0265	18.524	15.1322	20.9661	17.0544	17.6957	15.9755	14.0768	7.56979	30.5729	8.94314	28.2502	36.031	33.7037	47.2228	52.763	54.1764	46.5909	33.9699	17.0183	9.51214	34.7269	11.7586	12.5374	27.1581
74	25.34	104	Benzenemethanol, .alpha.-methyl-, (R)-	3.96912	4.64548	4.60687	2.95652	5.1851	4.28535	3.80774	4.3125	4.94842	3.8314	3.67768	3.85353	4.85927	3.50997	3.96064	4.01641	9.38767	9.20329	3.11658	4.82077	3.7443	4.33707	1.39679	0.998026	3.53233	7.02037	2.54895	7.93225	25.3946	3.85363	8.47382
75	25.47	69	2-Buten-1-one, 1-(2,6,6-trimethyl-1,3-cyclohexadien-1-yl)-, (E)-	11.5406	9.60772	14.1831	8.70894	5.96552	5.62019	6.59034	9.07781	11.4483	12.5794	14.0682	6.58644	5.68428	5.74819	16.6809	13.4675	6.37076	8.49216	6.02808	2.01594	2.13354	3.21486	5.76708	1.41495	2.06444	7.94885	5.17287	6.1292	4.7695	10.2206	6.8118
76	25.71	159	cis-Calamenene	5.60677	13.5943	3.19211	2.89754	3.36747	3.21165	3.4869	3.05876	3.0338	7.66524	5.53557	6.35212	13.7102	10.046	13.9063	2.80751	6.73926	11.2327	4.80891	6.89919	11.7385	4.92178	55.118	7.21189	7.12827	4.87296	2.39136	14.2673	40.7707	10.2244	7.0334
77	25.86	111	3,4-Dimethyl-3-pyrrolin-2-one	185.51	93.1382	278.094	207.73	315.42	366.987	444.268	302.184	360.555	163.169	533.775	227.6	362.828	366.484	508.42	258.917	653.27	258.863	436.199	308.797	310.792	648.95	509.525	445.128	376.288	359.921	437.28	298.82	148.002	37.8574	528.804
78	25.98	60	Hexanoic acid	333.583	426.358	528.911	0.0459553	0.349439	0.244809	0.207159	0.0557317	0.138518	404.793	0.27299	0.286792	268.824	0.0482209	0.711969	0.646169	0.122843	207.674	149.625	150.123	171.968	230.625	61.9685	0.405647	177.983	173.543	231.125	94.6472	158.751	207.303	146.69
79	26.01	142	Naphthalene, 1-methyl-	11.0266	164.818	206.917	242.304	135.397	145.016	226.372	197.092	250.452	179.142	313.145	216.234	281.874	233.403	435.871	309.669	314.457	113.676	150.038	163.906	149.713	276.539	206.281	276.74	255.022	302.056	197.286	188.311	269.084	352.005	225.655
80	26.1	121	.alpha.-Ionone	34.9976	41.8281	33.2916	19.694	19.4604	19.3221	26.3778	37.4778	45.1145	22.072	19.7795	30.0812	77.555	60.0002	25.4515	49.1243	58.5969	81.1731	64.2918	79.9636	67.3307	64.0091	74.8083	59.9095	84.9928	65.2817	91.6312	155.7	50.1614	55.8432	114.569
81	26.11	69	Geraniol	95.8727	445.71	99.9251	97.124	170.315	111.974	87.3875	85.4078	70.1567	109.507	66.6368	96.3735	727.287	802.208	26.7019	687.539	105.217	1186.46	740.914	1096.98	1319.78	652.794	1077.11	863.686	1189.13	838.888	1000.05	1891.58	648.279	398.912	1255.09
82	26.19	43	5,9-Undecadien-2-one, 6,10-dimethyl-, (E)-	43.5632	31.4688	40.1737	29.2198	21.5855	25.0533	35.6883	49.6361	66.6156	46.243	38.9186	27.0756	51.92	30.8063	32.9991	22.0186	64.4847	93.6389	23.0826	59.9652	62.2872	21.3575	17.7366	15.2125	33.3453	28.8943	29.644	126.317	28.3457	34.0451	69.0417
83	26.29	43	6-Methyl-6-nitroheptan-2-one	18.9424	18.0238	29.9763	21.2328	9.6427	13.7678	29.9632	29.9264	31.3043	22.5624	20.66	15.956	32.714	22.6107	20.1936	12.6609	47.1298	17.2102	20.8142	26.3549	14.0303	20.2638	17.0061	31.2779	27.4538	23.9859	30.1558	15.2062	12.9857	39.7658	48.2935
84	26.48	71	Propanoic acid, 2-methyl-, 3-hydroxy-2,2,4-trimethylpentyl ester	23.4735	4.60571	10.2837	7.6124	9.14361	8.15769	5.71524	7.21705	7.92078	6.73427	8.47405	5.52924	3.52318	4.26036	6.52482	27.844	152.003	219.24	16.8239	11.9262	11.4834	5.1284	13.1087	13.1567	22.8843	38.7972	1.63979	5.53434	3.86438	5.64494	2.37415
85	26.64	79	Benzyl alcohol	181.067	210.629	125.523	143.487	123.152	97.1021	80.7276	103.3	114.435	92.615	104.482	100.375	232.799	192.842	86.6684	268.149	195.494	296.513	159.035	131.77	112.208	122.225	52.5617	104.263	101.149	367.427	57.9757	334.428	337.256	105.993	198.083
86	26.67	127	2,5-Pyrrolidinedione, 1-ethyl-	122.128	77.944	169.268	108.841	104.919	123.011	137.26	148.102	191.003	70.8733	170.22	89.2055	145.262	163.918	260.902	193.719	253.346	113.972	120.024	98.4395	92.0192	148.167	132.561	116.267	103.532	157.27	139.453	140.323	66.0134	143.109	225.154
87	26.77	71	2,2,4-Trimethyl-1,3-pentanediol diisobutyrate	15.5727	11.8537	17.4112	17.5813	13.0467	12.3273	13.9427	14.0033	16.8514	13.8285	19.9967	13.9024	13.707	12.4527	19.9662	28.5408	114.89	153.581	16.3867	14.3594	12.6084	14.047	16.7543	18.201	24.2393	36.324	7.84969	10.0501	12.7681	16.312	8.27787
88	26.94	112	5,5'-Bi-1-pyrroline, 2,2'-diethoxy-	20.504	10.3892	30.0733	22.399	37.9556	45.9674	55.5087	31.9987	35.5376	14.7953	55.0535	21.1158	39.2056	44.4768	46.5049	23.6119	75.7014	31.3245	52.8642	43.5139	40.2979	91.2459	73.3024	53.0047	43.6426	41.1802	56.6962	38.8325	14.9435	3.05354	71.0357
89	27.17	166	2(4H)-Benzofuranone, 5,6,7,7a-tetrahydro-3,6-dimethyl-	3.19156	3.1769	3.89637	1.84563	0.879758	1.35603	2.35334	3.78116	5.28272	1.58207	1.49929	1.43688	4.16077	2.24829	2.2694	0.949919	5.81876	1.81869	2.48366	0.686948	1.52443	2.20434	0.862688	0.779494	0.907811	1.73756	3.21297	1.09092	2.88294	6.69504	5.04658
90	27.37	91	Phenylethyl Alcohol	354.582	418.968	421.9	373.138	559.653	452.521	331.892	324.085	367.666	407.35	410.435	336.059	459.793	400.423	587.011	585.035	836.278	775.197	484.895	380.654	404.881	344.624	63.3692	55.282	372.67	549.562	111.771	727.164	1621.01	189.384	381.965
91	27.44	157	.alpha.-Calacorene	2.36604	8.46285	1.22385	1.13433	1.15593	1.52824	1.64269	1.26233	1.02745	3.40984	2.99957	2.92562	5.34898	6.78476	6.3153	1.5205	2.65697	3.59682	1.85006	2.84437	3.99234	2.34327	18.1133	3.6703	3.28933	2.95571	1.73951	7.60393	16.4718	2.14905	3.33019
92	27.59	117	Benzyl nitrile	6.63423	180.74	4.48262	7.35957	11.6005	4.59857	17.2135	15.8992	6.00716	8.8587	3.95082	6.72275	9.9771	13.3882	1.84652	12.3727	3.89441	7.21836	6.45267	1.16883	1.22716	11.199	3.93329	2.13934	1.85028	9.78465	17.1067	35.7531	9.23901	54.9892	15.172
93	27.7	117	Benzeneacetaldehyde, .alpha.-ethylidene-	36.2591	8.97438	31.8947	12.2214	28.2316	33.8455	40.266	37.7401	42.1233	13.064	40.78	29.6269	16.1352	14.1011	39.0618	11.6504	43.0044	33.3495	17.1761	17.619	17.6599	20.1748	25.3815	19.0043	16.9091	19.7785	8.65594	18.5113	18.1484	6.09017	22.0122
94	27.91	177	β-Ionone	243.512	184.312	226.621	141.601	76.7259	118.144	225.563	292.857	363.011	148.601	155.659	174.846	364.688	218.175	186.187	64.413	489.104	137.468	172.202	47.5401	108.762	241.824	82.1696	75.0151	68.2476	131.453	278.913	82.984	171.209	157.572	315.208
95	28	164	2-Cyclopenten-1-one, 3-methyl-2-(2-pentenyl)-, (Z)-	0.968517	22.3818	0.72621	0.528309	1.17571	1.26257	2.30899	1.93506	0.531526	0.466712	0.199337	1.59977	1.31434	28.0214	0.0759843	1.82311	0.727153	2.04893	2.07593	16.3962	19.9879	3.1364	30.9843	3.6591	7.20805	4.97275	24.1886	27.3668	0.961642	42.7181	9.40739
96	28.11	82	3,7-Octadiene-2,6-diol, 2,6-dimethyl-	21.4534	90.6906	6.28308	7.50107	9.48706	9.99046	7.59394	10.9958	5.08926	6.50445	4.44065	19.6409	14.0975	81.3233	3.39556	27.5457	8.20581	16.2884	18.4458	30.644	31.1819	45.8967	42.8665	51.7198	30.7166	54.4424	118.355	21.7811	52.7003	26.063	39.8455
97	28.28	156	Naphthalene, 1,6-dimethyl-	2.22278	13.8013	19.9034	22.5113	15.8949	15.7577	23.3615	21.8315	27.4809	25.9634	33.7256	26.9436	28.9711	27.5184	42.7779	31.3737	30.9377	10.8784	9.12286	17.7681	17.668	31.8229	24.4044	30.8775	30.5361	31.7528	20.9066	22.7981	30.7104	32.5834	21.6533
98	28.39	126	Acetic acid isopropylidene-hydrazide	0.0598855	0.0167436	0.0266167	0.0540967	0.0704984	0.0814133	0.0837207	0.0812393	0.0428952	0.0409163	0.0176761	0.0630923	3.688	0.0608151	0.0363701	0.0779634	0.0274967	0.0335501	2.00956	2.0042	0.0176295	0.302086	0.0235688	0.0090198	0.270361	48.1013	14.1645	27.0056	42.5967	35.7758	19.3323
99	28.44	73	3-Hexenoic acid, (E)-	27.6401	16.5591	24.0546	30.7001	26.9543	30.7355	29.1454	28.1966	25.0254	24.3756	22.7888	19.8837	17.8894	19.4477	9.34561	5.60811	13.5562	13.6442	8.11695	10.7765	13.3214	54.9073	77.6529	8.99195	43.3268	10.3809	55.0996	8.825	10.3886	9.01907	37.8642
100	28.54	94	Ethanone, 1-(1H-pyrrol-2-yl)-	71.0035	26.4736	112.194	27.0268	76.9052	85.7025	76.4034	83.0253	77.9653	46.7831	163.514	53.0501	69.7216	39.4793	40.2512	33.5012	50.6544	116.407	30.3889	97.3163	83.5726	29.5811	61.6296	41.2871	102.692	112.157	169.545	113.207	107.249	210.112	140.237
101	29.22	94	Phenol	10.659	6.71549	15.0837	12.1198	12.5856	14.1496	11.2501	15.6538	13.6989	45.327	11.1387	8.69839	9.79738	8.10048	21.78	20.0004	14.6284	15.8103	13.8912	9.62887	8.47331	7.99787	10.0165	10.2042	15.5953	13.2476	5.54146	9.8353	10.1546	12.3945	8.80732
102	29.57	95	1H-Pyrrole-2-carboxaldehyde	30.6445	14.5613	35.7854	14.4286	35.9181	37.4887	44.2416	37.365	44.2369	14.1832	31.9712	22.4959	17.777	18.2121	48.104	20.339	91.9563	108.036	56.1837	29.2113	27.4393	89.1732	33.0395	18.1317	29.9071	30.2711	85.2591	70.6697	63.7732	49.1979	88.7583
103	29.65	71	2(3H)-Furanone, dihydro-3-hydroxy-4,4-dimethyl-, (.+/-.)-	16.009	16.245	19.368	10.0441	14.4599	14.0692	12.8852	17.6155	19.1784	11.632	18.2313	11.059	10.7373	13.6319	24.9759	15.034	14.5987	13.4413	7.7493	17.348	14.5902	8.08776	10.0455	11.2243	18.597	23.9296	17.7272	15.6907	14.8932	60.1718	22.7399
104	29.79	128	Furaneol	1.62182	0.753082	2.09227	1.70098	2.98717	3.00055	3.01723	2.52856	2.52159	2.42171	6.28898	2.81432	3.08656	2.13244	1.09602	0.677767	2.95169	3.86649	1.96684	3.13002	3.94071	1.74283	3.31873	1.87799	3.2852	2.42781	2.96097	2.21205	2.9037	1.93101	2.64645
105	29.84	85	2-Pyrrolidinone	2.53195	2.09994	3.31195	1.85187	4.51735	4.1969	3.86125	3.00266	3.14034	2.37678	4.53536	2.6529	4.93764	4.58192	3.31665	3.11446	7.12299	9.14782	2.96961	12.1456	10.6735	8.1612	19.3345	5.30475	9.82106	12.5655	9.0106	8.00598	5.04855	4.99836	7.32001
106	29.95	69	1,6,10-Dodecatrien-3-ol, 3,7,11-trimethyl-, (E)-	17.8438	63.8827	6.69915	8.32584	10.7435	11.6081	12.8274	13.7612	10.1691	12.5004	7.92981	13.9844	14.8171	62.5848	4.86217	7.34516	9.77195	11.721	10.9648	2.56459	4.57265	17.7355	7.55097	5.23497	4.06484	29.5937	15.7774	24.3418	19.9092	13.7062	4.98193
107	30.3	60	Naphthalene, 1,3-dimethyl-	0.408954	0.598264	1.15775	0.814751	0.528529	0.43924	0.591404	0.617687	0.741135	0.651163	0.47359	0.342353	0.307804	0.306731	0.478419	0.298054	0.29181	0.133577	0.151273	0.305723	0.328349	0.181535	0.270793	0.238048	0.339546	0.134136	0.103612	0.105009	0.121864	0.144699	0.123443
108	30.7	107	p-Cresol	1.48429	1.15538	2.39682	1.56213	1.49477	1.42874	1.34511	2.0697	2.32716	2.02589	2.15352	1.5291	1.35869	1.35172	1.68459	1.55193	1.42902	1.8926	0.951566	2.0375	1.91805	1.58355	1.97006	1.72336	2.15131	1.68992	1.14241	1.49536	1.88131	3.6572	1.7273
109	31.06	109	1,3-Benzodioxole, 3a,7a-dihydro-2,2,4-trimethyl-	2.40074	0.869811	3.0312	0.690045	4.05493	3.70414	3.08934	4.7525	4.05543	1.43822	4.62684	1.90227	2.0065	1.0297	1.76306	1.76234	2.47628	12.1596	1.49871	6.11587	4.68539	2.14429	4.42927	1.57774	5.63464	5.63771	8.63657	7.88256	5.70039	4.11617	5.71185
110	31.1	135	Pregna-5,16-dien-3.beta,9.alpha.-diol-20-one	0.276475	1.34624	0.544441	0.28485	0.235422	0.180789	0.236721	0.288204	0.299961	0.289342	0.375451	0.239987	1.30357	2.195	1.45447	1.32668	1.25222	2.0031	2.58731	47.0386	56.5651	5.41192	19.7317	23.4025	56.7219	0.820006	0.529912	2.55806	2.31361	0.987017	1.79218
111	31.42	95	Cedrol	3.29156	1.89373	5.82615	2.87573	4.71885	2.93169	3.89515	3.21679	6.44555	1.11574	3.31972	3.28247	0.724889	1.12829	0.728154	4.04437	2.95732	4.44208	1.77237	3.48156	3.144	3.83088	3.99511	3.81989	4.75033	4.84996	0.78805	8.4251	2.04324	9.81283	2.6744
112	31.54	58	2-Pentadecanone, 6,10,14-trimethyl-	6.57156	8.66403	9.30234	4.03614	3.63957	4.90223	9.4826	12.2235	10.1668	5.14851	3.56149	4.93972	12.0828	8.14773	7.38647	3.11312	18.9958	2.88235	2.66406	2.52264	5.7798	5.6447	4.61221	6.44631	5.01755	5.91708	7.10589	9.19389	14.5201	30.2803	10.892
113	31.62	122	1,7-Octadiene-3,6-diol, 2,6-dimethyl-	0.845384	0.407441	1.73772	0.398998	1.59808	1.84045	1.37549	2.50172	1.80132	0.926655	3.85195	0.79766	1.85864	1.35043	0.584953	0.444667	0.631053	2.51419	0.400563	5.24793	4.27413	0.532557	5.86785	1.8387	4.39601	3.16901	4.12544	4.92662	1.95036	5.66779	2.82167
114	31.74	98	4-Hydroxy-3,5,5-trimethylcyclohex-2-enone	3.63083	4.01769	5.52563	3.16323	1.87785	2.66954	3.23098	6.4063	7.03668	2.57651	3.24155	2.49531	6.07166	4.68659	3.2986	2.00971	7.3782	4.65627	2.92135	1.74658	3.26248	1.76743	1.88351	1.45757	2.21612	3.77525	5.7985	3.20321	4.64147	20.2515	8.46777
115	31.81	170	Naphthalene, 2,3,6-trimethyl-	0.492811	0.784739	1.17116	1.14091	1.088	0.918515	1.34855	1.33778	1.59561	2.04141	1.93491	1.73112	1.25169	1.48229	2.14945	1.68058	2.9385	0.813575	0.59675	1.26337	1.17416	1.69505	1.64851	1.71536	1.84852	2.36772	1.02427	1.93537	1.74641	2.23448	1.22673
116	31.98	124	4-(1-Hydroxyallyl)-2-methoxyphenol	22.1002	27.4814	24.0829	20.8015	18.8803	29.4396	23.1073	47.2659	56.4136	25.719	31.6939	28.3182	50.6256	49.7508	22.11	27.2092	45.0746	14.7963	20.7648	8.09431	16.5152	18.8774	14.8246	25.8881	23.4799	32.9884	52.9472	23.7691	40.5002	39.8037	44.2734
117	32.24	69	Oxiranecarboxaldehyde, 3-methyl-3-(4-methyl-3-pentenyl)-	8.51568	11.1709	2.6958	3.01695	4.95547	4.67049	3.84715	5.8187	2.80646	8.26115	3.75996	16.0192	6.24952	15.2985	2.51321	4.14681	7.90739	8.33773	5.88097	5.98365	6.66193	4.68458	6.87884	9.59276	6.70507	5.37288	17.0971	10.3771	11.9573	13.5881	4.1828
118	32.48	152	Thiazolidin-4-one, 3-ethyl-5-(1-ethyl-1H-pyrazol-4-ylmethylene)-2-thioxo-	2.03189	0.904087	4.15258	2.43531	1.29449	1.24001	1.32434	1.89731	2.71045	1.61162	2.21828	1.38739	5.71626	0.851083	3.39273	0.855495	1.2241	5.75088	0.586184	2.44716	1.74899	7.99787	9.07096	5.69972	2.60815	12.1929	0.28597	16.7322	7.87008	0.362169	8.80062
119	32.65	135	Thymol	0.464223	11.2836	0.934884	0.6925	0.673793	0.560074	0.780528	0.750206	0.73705	1.1987	1.18803	0.563692	1.89026	15.7111	0.533544	1.34931	3.23449	2.47299	1.41438	22.8391	27.8337	2.40637	9.93341	50.6367	23.3815	0.800134	2.15964	2.60749	1.40085	2.43668	1.63451
120	32.78	171	1,3,5-Triazine-2,4,6(1H,3H,5H)-trione, 1,3,5-trimethyl-	2.28868	0.619653	2.04102	2.16327	2.08592	2.1897	2.30085	2.44507	2.30411	1.64479	3.22198	2.60679	3.03859	1.46642	2.29014	1.23655	2.41602	1.56377	3.12854	1.17401	1.27615	2.11933	1.66642	2.03605	1.63116	2.12945	4.01321	1.2306	1.55828	0.825159	1.65079
121	33.24	74	Hexadecanoic acid, methyl ester	13.7993	5.94479	6.42315	7.36663	7.66918	9.78858	12.0635	13.4849	13.4207	9.02475	12.599	5.48829	11.3972	12.5185	28.4465	8.44455	25.8504	2.51325	4.92517	3.85188	5.25155	7.7301	7.79261	9.41019	4.7205	13.6685	32.7473	28.1419	13.5874	50.3711	38.8697
122	33.91	88	Hexadecanoic acid, ethyl ester	5.84468	7.31683	16.4508	11.2668	39.585	35.2499	19.6762	14.8135	35.472	15.0777	33.0031	18.5067	11.0937	15.3249	91.1148	86.7036	55.1317	2.84725	10.481	27.4753	43.8445	66.1947	59.8918	119.215	122.403	32.0512	18.5667	27.6522	34.9612	26.6767	36.9659
123	34.11	43	4H-Pyran-4-one, 2,3-dihydro-3,5-dihydroxy-6-methyl-	5.13871	4.82295	2.1896	2.79715	5.10008	4.91116	5.282	5.25953	2.78046	5.30233	17.9743	6.09642	8.07867	5.15944	2.43792	0.811116	4.91613	6.1266	5.9875	4.21788	6.09162	2.18031	2.74604	1.89862	2.82731	2.20057	5.38479	2.47236	4.50917	3.19513	6.81528
124	34.13	139	1H-Pyrrole-2,5-dione, 3-ethyl-4-methyl-	6.77953	6.69122	11.8043	4.2652	3.28016	4.17854	6.39294	9.60035	11.7055	5.67302	6.3267	5.29903	13.3195	8.09705	6.75298	4.83778	13.8114	6.49927	6.26006	2.45931	4.41187	5.24218	3.51771	2.93941	3.70149	10.0679	11.3917	4.48212	8.6975	24.6619	16.5552
125	34.62	163	Acetic acid, 2-(2,2,6-trimethyl-7-oxa-bicyclo[4.1.0]hept-1-yl)-propenyl ester	0.679422	0.714686	1.45789	0.641468	2.28216	5.93951	7.45499	6.84699	3.23879	1.04222	6.92826	0.796982	3.12249	0.994786	1.52263	3.06966	3.68912	1.43866	0.717173	1.9533	1.99696	0.689889	1.69164	1.74288	2.2226	5.01304	0.622527	34.858	1.60696	3.17616	0.976973
126	34.93	191	2,4-Di-tert-butylphenol	26.0664	180.353	302.22	364.65	194.883	139.783	140.579	142.336	233.213	242.708	290.863	188.773	142.125	218.09	386.627	132.344	162.37	109.86	126.946	295.827	136.494	198.646	186.116	193.654	214.357	130.235	89.7769	69.6814	154.551	171.842	106.837
127	35.34	111	2(4H)-Benzofuranone, 5,6,7,7a-tetrahydro-4,4,7a-trimethyl-, (R)-	118.909	117.732	156.907	78.7368	34.549	56.1099	90.4501	188.721	220.749	48.3806	65.5996	73.8781	190.551	131.628	106.401	65.1234	322.649	95.411	85.5476	34.0682	56.0999	87.2665	45.4624	32.2685	47.2515	97.034	174.985	74.8785	119.422	300.145	277.004
128	35.86	149	Diethyl Phthalate	2.29074	8.50433	10.9038	3.94268	3.49746	6.19054	7.51789	6.44071	4.77777	1.91025	45.4595	0.948274	1.2862	0.80296	1.48985	128.203	488.864	6.91657	6.81153	28.868	34.1142	2.08468	22.2111	20.0813	49.3368	215.62	0.981669	182.918	29.9005	57.387	10.1689
129	36.02	83	3,3-Diethyl-pyrrolidine-2,4-dione	7.84425	5.4154	12.0888	10.0167	13.3594	14.401	15.9651	14.8379	17.824	9.495	21.5024	12.6894	16.7813	19.4207	25.7094	16.8693	25.41	8.74787	11.0648	11.2794	11.4524	18.2055	18.4317	17.4554	16.1723	17.7695	19.4525	13.9643	9.90199	4.22854	20.1432
130	36.9	105	Benzoic acid	0.124571	0.0654981	0.11332	0.122175	0.132926	0.125092	0.121491	0.104265	0.132431	0.139237	0.134627	0.148337	0.0899002	0.11454	0.231401	0.164602	0.156413	0.0658747	0.0636426	0.0523853	0.0380945	0.151358	0.146447	0.0720307	0.0471685	0.114726	0.0469131	0.0465134	0.0919763	0.196716	0.0413955
131	38.69	149	1,2-Benzenedicarboxylic acid, bis(2-methylpropyl) ester	29.1727	8.64531	16.154	12.051	15.6853	12.3908	14.1501	16.0751	18.8479	11.3197	8.38437	12.9707	4.94531	6.13437	12.0918	33.1686	33.3788	22.7913	11.0006	23.4259	25.3542	13.9636	21.6708	21.1243	22.7042	30.2691	10.0796	49.8811	14.6069	40.4043	14.1769
132	38.95	91	Benzeneacetic acid	0.260814	0.14473	0.194881	0.170483	0.16764	0.151065	0.159352	0.135176	0.222846	0.233923	0.370589	0.269311	0.295876	0.138255	0.149578	0.406699	0.183776	0.167084	0.20186	0.254263	0.369009	0.326233	0.343535	0.25778	0.291275	0.294189	0.123291	0.193054	0.235929	0.235947	0.299429
133	39.03	173	Butanamide, N-methyl-4-(methylthio)-2-(2,2-dimethylpropylidene)amino-	9.74327	1.33527	5.60125	16.36	3.9471	1.83772	1.72807	3.53528	7.2579	1.44382	1.78916	4.34894	6.19741	5.87082	2.31541	1.95665	1.55937	25.9702	0.710621	0.534542	0.567083	2.64322	1.26671	1.00148	1.0382	1.79338	14.4938	1.08886	1.34573	2.21722	15.0635
134	39.49	44	2(3H)-Furanone, dihydro-4-hydroxy-	7.03892	3.88155	6.33314	4.72714	36.087	23.2439	11.8016	7.34698	4.50293	6.15493	4.43466	6.01986	5.04353	7.2982	3.19589	6.11395	2.55228	6.39291	3.6117	32.6303	27.9223	9.43131	25.5509	40.5223	30.9473	12.3578	21.0528	8.26638	3.44795	55.0919	15.4259
135	39.52	153	3-Pyridinemethanol, 5-hydroxy-4,6-dimethyl-	1.07846	0.49535	1.57527	0.47248	1.68771	1.9155	1.72175	2.89803	1.55825	0.788176	3.64279	0.843334	2.22222	2.13188	1.27035	0.477871	0.645881	3.42087	0.665318	5.39863	4.68704	0.757262	5.10391	1.21846	3.78053	4.08867	5.52715	5.66187	1.66392	2.75068	3.91421
Note: Data showed here are the six duplicates of concentration of VFCs in black tea samples from Guangdong province China. The unit of the data is ng/g.
